# Supplementary material for: Efficient thermally activated delayed fluorophores featuring multi-donor arms and a π-extended acceptor core
Source: Royal Society of Chemistry journal article supplement (doi:10.1039/d4tc00988f), 2024-01-01
Supplement: d4tc00988f1.pdf [file d4tc00988f1.pdf]

## Electronic Supplementary Information

### Efficient thermally activated delayed fluorophores featuring multi-donor arms and a $\pi$ -extended acceptor core

Bo Liu,<sup>a,b</sup> Si-Wei Chen,<sup>a,b</sup> Wen-Cheng Chen,<sup>\*a,b</sup> Longjiang Xing,<sup>a,b</sup> Ji-Hua Tan,<sup>a,b</sup> Wei-Le Wu,<sup>a,b</sup>  
Xiao-Long Liu,<sup>a,b</sup> Jia-Xiong Chen,<sup>a,b</sup> Hao-Li Zhang,<sup>\*c</sup> and Yanping Huo<sup>\*a,b,d</sup>

<sup>a</sup>Guangdong Provincial Laboratory of Chemistry and Fine Chemical Engineering Jieyang Center, Jieyang, 515200,  
P. R. China

<sup>b</sup>School of Chemical Engineering and Light Industry, Guangdong University of Technology, Guangzhou, 510006,  
P. R. China. E-mail: wencchen@gdut.edu.cn (W.-C. Chen); yphuo@gdut.edu.cn (Y. Huo)

<sup>c</sup>State Key Laboratory of Applied Organic Chemistry (SKLAOC), Key Laboratory of Special Function Materials  
and Structure Design (MOE), College of Chemistry and Chemical Engineering, Lanzhou University, Lanzhou  
730000, P. R. China. E-mail: haoli.zhang@lzu.edu.cn (H.-L. Zhang)

<sup>d</sup>Analytical & Testing Center, Guangdong University of Technology, Guangzhou, 510006, P. R. China

## ***General Information***

The reagents and solvents for the synthesis and measurements were used as received without further purification. NMR spectra were recorded with a Bruker Advance-400 spectrometer. Mass spectra were obtained with a Thermo Scientific Q Exactive spectrometer. Thermogravimetric analysis (TGA) was measured on a NETZSCH STA449F5 Jupiter synchronous thermal analyzer. Cyclic voltammetry (CV) was carried out on an Autolab PGSTAT302N electrochemical workstation. The electrode configuration comprises an Ag/AgCl reference electrode, a Pt wire counter electrode, and a glassy carbon working electrode. The CV scan was conducted using a tetra-*n*-butylammoniumhexafluorophosphate (Bu<sub>4</sub>NPF<sub>6</sub>) dichloromethane solution (0.1 M) as an electrolyte at a scan rate of 100 mV s<sup>-1</sup>. Absorption spectra were recorded on a Shimadzu UV-2700 spectrophotometer. Photoluminescence (PL) spectra in solutions, low-temperature PL spectra in thin films, PL quantum yields (The  $\Phi_p$  of the evaporation film was evaluated by integrating sphere in the air; The  $\Phi_{PL}$  was calculated by the area integral of the PL spectra of the evaporation film before and after deoxygenation;  $\Phi_d = \Phi_{PL} - \Phi_p$ ), and transient PL decay were measured using an Edinburgh Instruments FLS980 spectrometer. Crystallographic data were collected at 170 K on a Rigaku Oxford Diffraction Supernova Dual Source diffractometer equipped with an Atlas S2 CCD.

## ***Theoretical Calculations***

The ground state geometries ( $S_0$ ) were optimized by the density functional theory (DFT). The lowest singlet excited state ( $S_1$ ) geometries were optimized by time-dependent DFT (TD-DFT). TD-DFT calculated the excited-state information at their ground state geometries and lowest singlet excited state geometries. All the above theoretical calculations were performed using the Gaussian 09 program package. The ground states were performed at B3LPY/6-31G (d) level. The excited states and natural transition orbitals (NTOs) were calculated using time-dependent TD-DFT methods (B3LYP/6-311G (d), IOP (9/40=5)) in tetrahydrofuran. The charge transfer amount of each fragment in the molecular natural transition orbital was calculated by the Multiwfn 3.7 program.<sup>1</sup> The frontier molecular orbital electron cloud distribution, the particle and hole distribution of the natural transition orbital, and the molecular ground state and excited state configurations were plotted by the visual molecular dynamics (VMD) program.<sup>2</sup>

### Device fabrication and measurement

Devices were prepared on glass substrates with indium tin oxide (ITO) coating ( $15\ \Omega$  per square). The ITO substrates were treated with an ultrasonic bath in isopropanol and deionized water and then dried under nitrogen flow. The pre-cleaned ITO substrates experienced UV ozone treatment (20 min). Substrates were instantly loaded into a deposition chamber with a  $5 \times 10^{-7}$  Torr base pressure. The deposition rate of organic layers was kept at  $1\text{--}2\ \text{\AA}\ \text{s}^{-1}$ , while those for LiF and Al deposition were  $0.1$  and  $6\ \text{\AA}\ \text{s}^{-1}$ , respectively. Luminance and electroluminescence spectra were acquired from a PhotoResearch PR-745 photometer. Current density–voltage characteristics were recorded on a Keithley 2400 power source. Electroluminescence distribution was measured with an angle-dependent device testing system (C9920-11, Hamamatsu Photonics). Device measurements were performed under ambient conditions without encapsulation.

### Synthesis

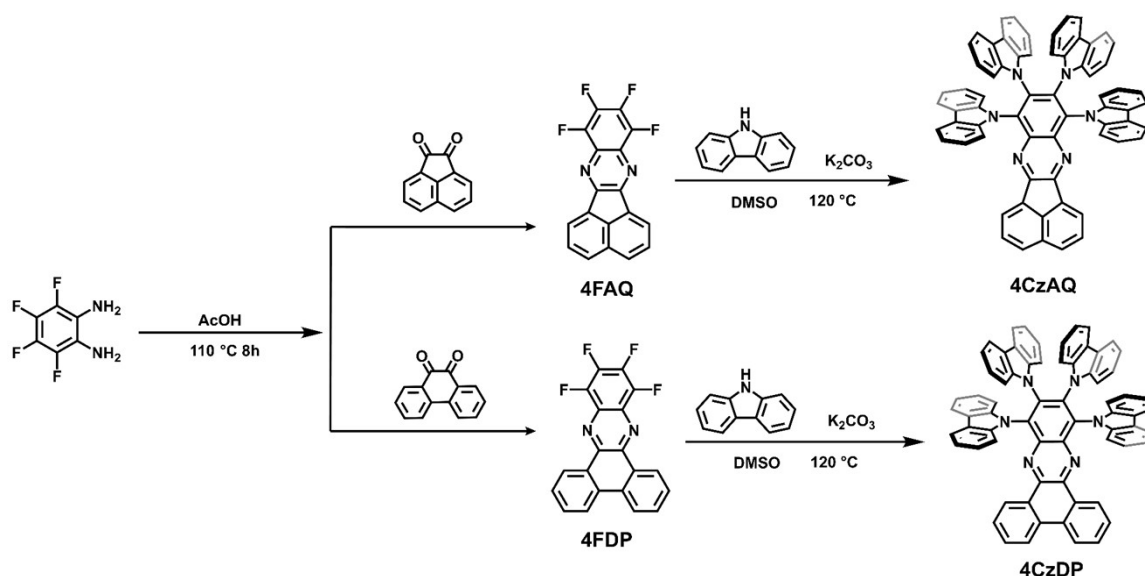

**Scheme S1** Synthetic routes of **4CzAQ** and **4CzDP**.

The starting materials 3,4,5,6-tetrafluorobenzene-1,2-diamine were purchased from Bidepharm Co., Ltd (Shanghai, China) and used directly without further purification.

**8,9,10,11-tetrafluoroacenaphtho[1,2-*b*]quinoxaline (4FAQ):** 3,4,5,6-tetrafluorobenzene-1,2-diamine (0.18 g, 1 mmol), acenaphthylene-1,2-dione (0.18g, 1 mmol )

and 50 ml of acetic acid were added to a 150 mL two-necked flask containing a magnetic stirrer. The reaction mixture was heated to 110 °C for 8 hours under a nitrogen atmosphere. After cooling to room temperature, the mixture was poured into water, and the filter residue was collected by filtration to obtain a yellow solid 4FAQ crude product (0.27 g, 83 %), which was directly put into the next reaction without purification. <sup>1</sup>H NMR (400 MHz, CDCl<sub>3</sub>) δ 8.09 (dd, *J*=5.0, 0.8, 2H), 7.97 (d, *J*=5.0, 2H), 7.71 (t, *J*=4.9, 2H).

**10,11,12,13-tetrafluorodibenzo[*a,c*]phenazine (4FDP):** The synthesis method is consistent with 4FAQ. By simply changing the substrate to phenanthrene-9,10-dione (0.2 g, 1 mmol) in the condensation stage, the orange solid 4FDP crude product (0.3 g, 85 %) was finally obtained, which could be directly used in the next step without purification. <sup>1</sup>H NMR (400 MHz, CDCl<sub>3</sub>) δ 8.77 (dd, *J*=4.9, 1.1, 2H), 8.19 (dd, *J*=4.9, 1.1, 2H), 7.62 (td, *J*=5.0, 1.1, 2H), 7.58 (td, *J*=5.0, 1.1, 2H).

**8,9,10,11-tetra(9*H*-carbazol-9-yl)acenaphtho[1,2-*b*]quinoxaline (4CzAQ):** 4FAQ (0.33 g, 1 mmol) and dry DMSO (20 mL) were heated in a 100 mL two-neck flask to 100 °C and stirred to dissolve. The reaction system of carbazole (0.75 g, 4.5 mmol) and K<sub>2</sub>CO<sub>3</sub> (1.24 g, 9 mmol) was added and heated to 120 °C for 10 h. At the end of the reaction, the mixture was cooled to room temperature, poured into water, vacuum filtration, and the filter residue was collected to obtain a yellow solid crude product. The dark yellow solid **4CzAQ** (0.77g, 84 %) was obtained by silica gel chromatography purification column (DCM/PE, 1:2). <sup>1</sup>H NMR (400 MHz, CDCl<sub>3</sub>) δ 8.07 (d, *J*=8.2, 2H), 7.93 (d, *J*=7.0, 2H), 7.84 (d, *J*=7.2, 4H), 7.68 (dd, *J*=8.2, 7.1, 2H), 7.32 (d, *J*=7.3, 4H), 7.16 – 7.01 (m, 12H), 6.98 – 6.89 (m, 4H), 6.74 (t, *J*=7.2, 4H), 6.63 – 6.53 (m, 4H). <sup>13</sup>C NMR (400 MHz, CDCl<sub>3</sub>) δ 153.10, 141.68, 140.97, 138.99, 138.28, 136.37, 134.32, 126.94, 125.18, 124.50, 124.06, 123.76, 120.41, 120.33, 119.94, 119.45, 111.32, 110.49. MS (ESI): calcd for C<sub>66</sub>H<sub>38</sub>N<sub>6</sub> [M]<sup>+</sup> 915.07, found 915.6817.

**10,11,12,13-tetra(9*H*-carbazol-9-yl)dibenzo[*a,c*]phenazine (4CzDP):** The synthesis method is consistent with **4CzAQ**. By replacing the substrate with 4FDP (0.35 g, 1 mmol), the orange-red solid crude product was finally obtained, and the red solid **4CzDP** (0.3 g, 84 %) was purified by chromatographic column (DCM/PE, 1:2). <sup>1</sup>H NMR (400 MHz, CDCl<sub>3</sub>) δ 8.42 (d, *J*=8.2, 2H), 8.10 (d, *J*=8.1, 2H), 7.92 (d, *J*=7.7, 4H), 7.66 (dd, *J*=11.2, 4.1, 2H), 7.43 – 7.28 (m, 6H), 7.17 (dd, *J*=8.2, 3.7, 8H), 7.09 (t, *J*=7.4, 4H), 6.96 (t, *J*=7.7, 4H), 6.78 (t, *J*=7.4, 4H), 6.64 (t, *J*=7.7, 4H). <sup>13</sup>C NMR (400 MHz, CDCl<sub>3</sub>) δ 152.95, 148.64, 142.88, 141.31, 139.79, 138.95, 137.42, 136.94, 134.46,

133.97, 127.09, 124.41, 124.21, 122.75, 122.30, 115.49, 115.05, 110.96, 110.13. MS (ESI): calcd for  $C_{68}H_{40}N_6 [M]^+$  941.11, found 941.5639.

### ***Determination of Rate Constants***

The prompt lifetimes were obtained by exponentially fitting the PL decay curves with mono-exponential function as  $I_t = I_0 e^{-t/\tau_p}$ , in which  $I$  is the photoluminescence intensity,  $t$  is decay time, and  $\tau_p$  is the prompt lifetime. The experimental PL decay can be expressed with a bi-exponential function as  $I_t = B_1 e^{-t/\tau_p} + B_2 e^{-t/\tau_d}$  in which  $B_1$  and  $B_2$  are the quantities of emission components,  $\tau_p$  and  $\tau_d$  are the lifetimes of prompt (p) and delayed (d) components, respectively.

The total and delayed fluorescence quantum efficiencies ( $\Phi_{PL}$  and  $\Phi_d$ ) were determined using the prompt fluorescence quantum efficiency ( $\Phi_p$ ) and the relative ratios between prompt and delayed components, which were calculated from the following transient PL measurements.

When  $k_{IC} \ll k_F$ ,  $k_{IC}$  can often be ignored, and nonradiative transitions of singlet excitons ( $k_{nr}$ ) are considered the main loss channel due to the long lifetime before decay. The critical kinetic parameters of the **4CzAQ** and **4CzDP** doped films were calculated according to the following equations:

$$k_p = \frac{1}{\tau_p} \quad (1)$$

$$k_d = \frac{1}{\tau_d} \quad (2)$$

$$k_F = \frac{k_p k_d}{k_{RISC}} \Phi_{PL} \quad (3)$$

$$k_{ISC} = k_p (1 - \Phi_p) \quad (4)$$

$$k_{RISC} = \frac{k_p k_d \Phi_d}{k_{ISC} \Phi_p} \quad (5)$$

$$k_{nr} = \frac{k_p k_d}{k_{RISC}} (1 - \Phi_{PL}) \quad (6)$$

where  $\tau_p$  and  $\tau_d$  represent the prompt and delayed decay lifetimes, respectively;  $\Phi_{PL}$ ,  $\Phi_p$ , and  $\Phi_d$  are the total, prompt, and delayed fluorescence quantum efficiencies, respectively;  $k_p$ ,  $k_{RISC}$ , and  $k_d$  are the rate constants of prompt fluorescence, the RISC, and delayed fluorescence decay, respectively; and  $k_{nr}$  is the nonradiative decay rate constant of singlet excitons.

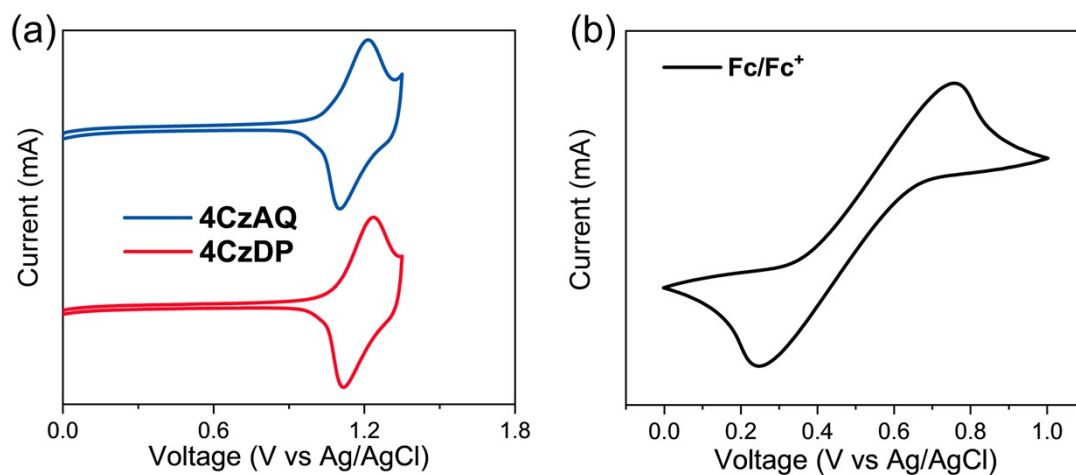

**Fig. S1** Cyclic voltammogram of oxidative scans of **4CzAQ**, **4CzDP**, and ferrocene.

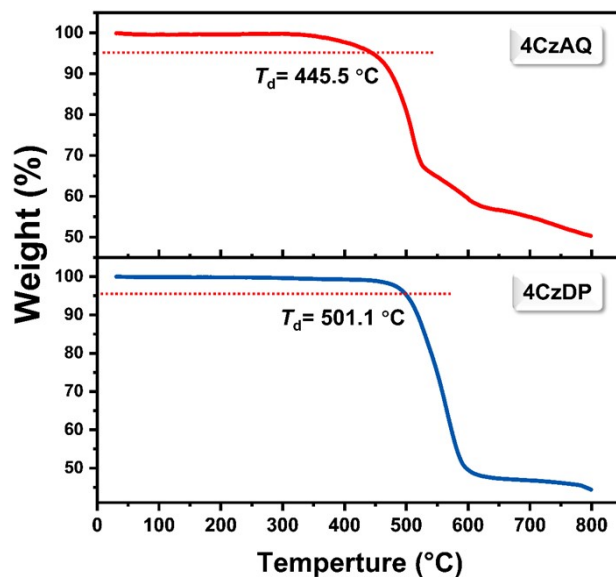

**Fig. S2** The TGA curves of **4CzAQ** and **4CzDP**.

**Table S1** Thermal and electrochemical data of **4CzAQ** and **4CzDP**.

| Compounds    | $T_d$ (°C) | HOMO (eV) | LUMO (eV) | $E_g$ (eV) |
|--------------|------------|-----------|-----------|------------|
| <b>4CzAQ</b> | 445.5      | -5.44     | -2.92     | 2.52       |
| <b>4CzDP</b> | 501.1      | -5.47     | -3.15     | 2.32       |

**Table S2** DFT optimized structures of AQ, DP, **4CzAQ** and **4CzDP**.

| Compounds    | HOMO (eV) | LUMO (eV) | $E_g$ (eV) | $E_{S1}$ (eV) | $E_{T1}$ (eV) | $\Delta E_{ST}$ (eV) | $f$   |
|--------------|-----------|-----------|------------|---------------|---------------|----------------------|-------|
| AQ           | -6.01     | -2.03     | 3.98       | 3.50          | 2.37          | 1.13                 | 0.055 |
| DP           | -6.03     | -2.21     | 3.82       | 3.26          | 2.32          | 0.94                 | 0.019 |
| <b>4CzAQ</b> | -5.30     | -2.48     | 1.92       | 2.23          | 2.07          | 0.16                 | 0.023 |
| <b>4CzDP</b> | -5.34     | -2.73     | 2.05       | 2.03          | 1.85          | 0.18                 | 0.021 |

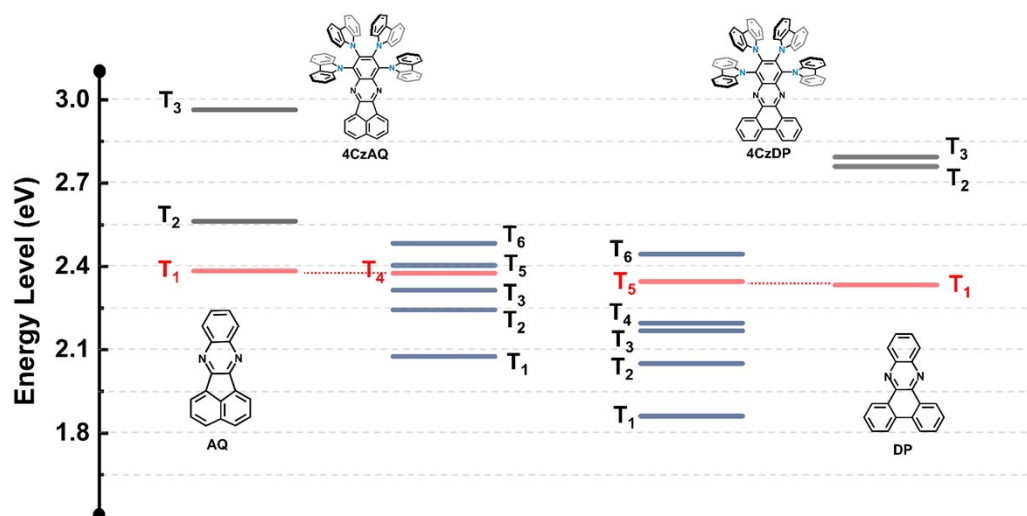

Fig. S3 Excited triplet energy levels of AQ, DP, 4CzAQ and 4CzDP.

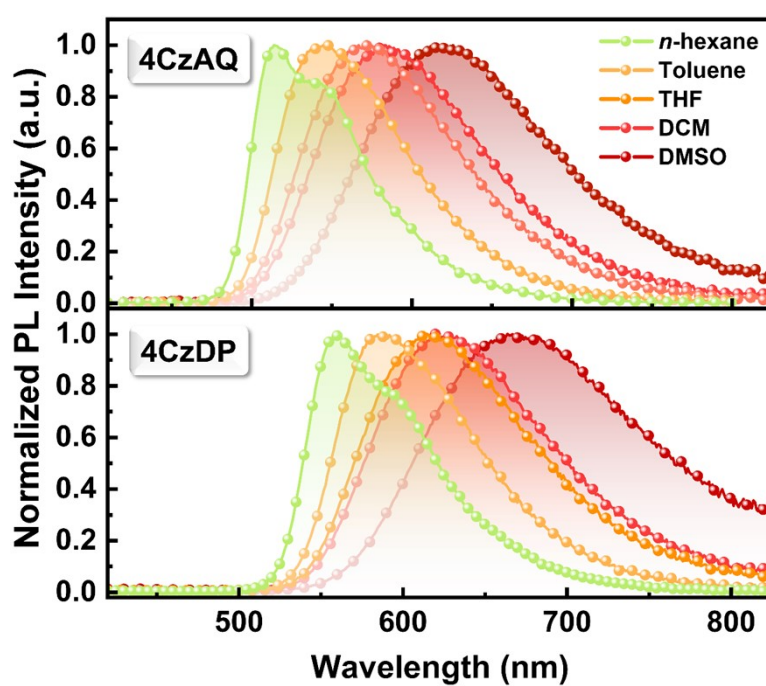

Fig. S4 PL spectra of 4CzAQ and 4CzDP diluted in *n*-hexane, toluene, THF, DCM and DMSO at room temperature.

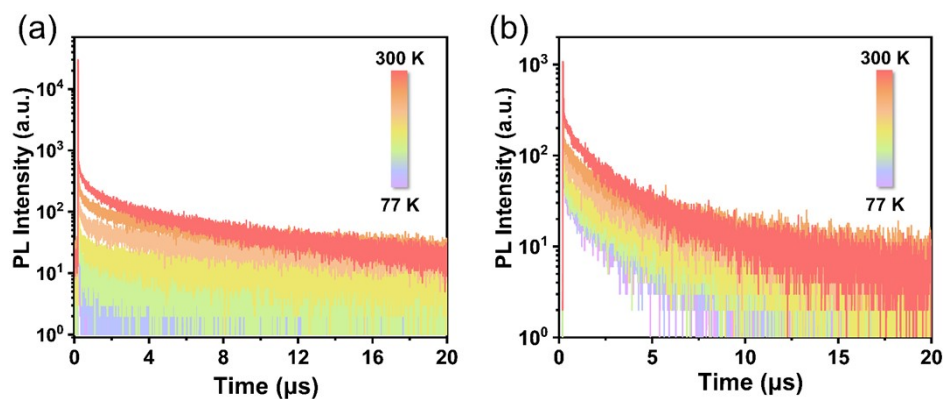

**Fig. S5** Transient PL decays of (a) **4CzAQ** and (b) **4CzDP** doped film (10 wt.% in PMMA) at varying temperatures.

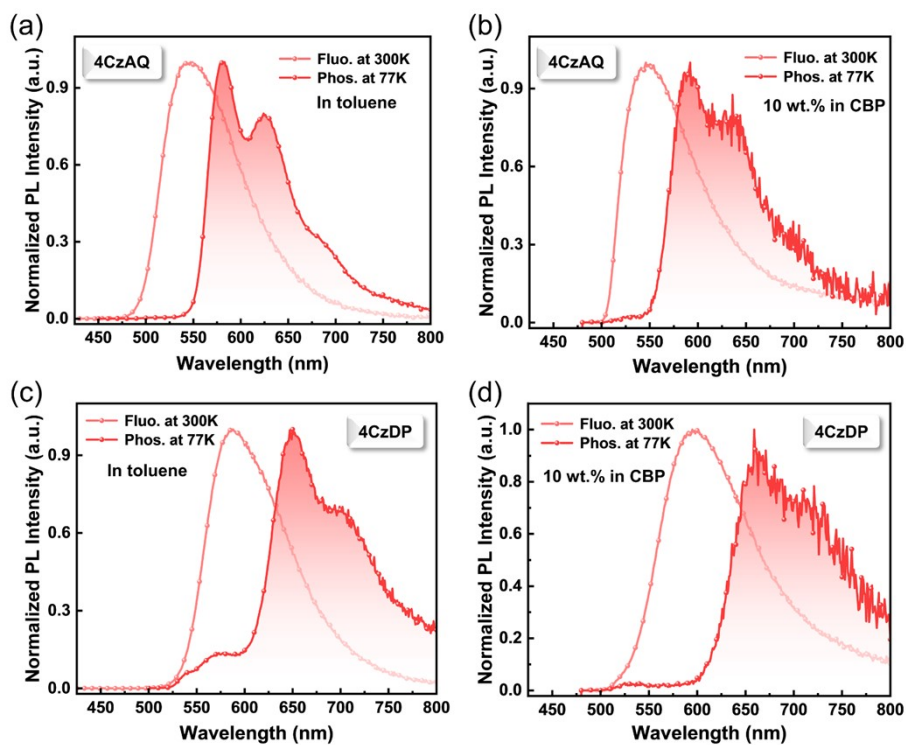

**Fig. S6** (a) Fluorescence and phosphorescence spectra of **4CzAQ** diluted in toluene ( $10^{-5}$  mol L $^{-1}$ ); (b) Fluorescence and phosphorescence spectra of **4CzAQ** doped in CBP film (10 wt.%); (c) Fluorescence and phosphorescence spectra of **4CzDP** diluted in toluene ( $10^{-5}$  mol L $^{-1}$ ); (d) Fluorescence and phosphorescence spectra of 10 wt.% **4CzDP** doped in CBP film (10 wt.%).



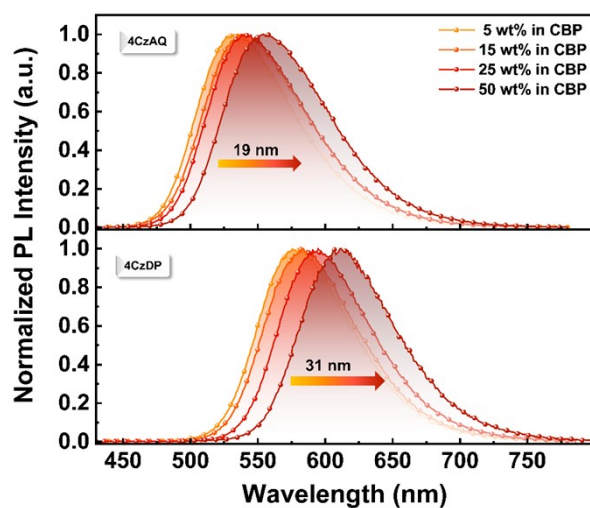

**Fig. S7** The PL spectra of 5-50 wt.% doped films of **4CzAQ** and **4CzDP**.

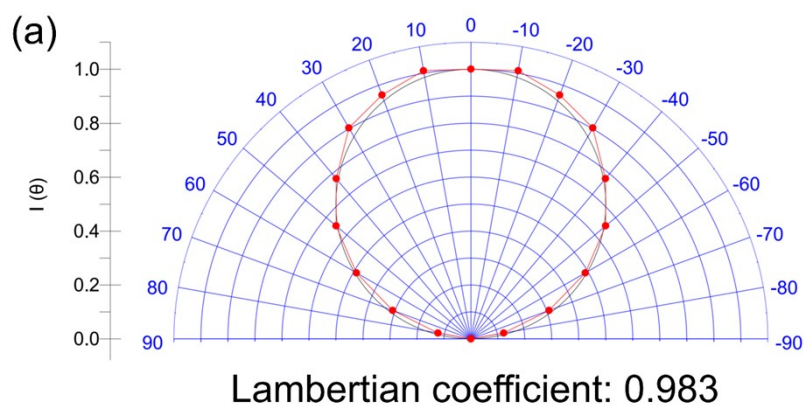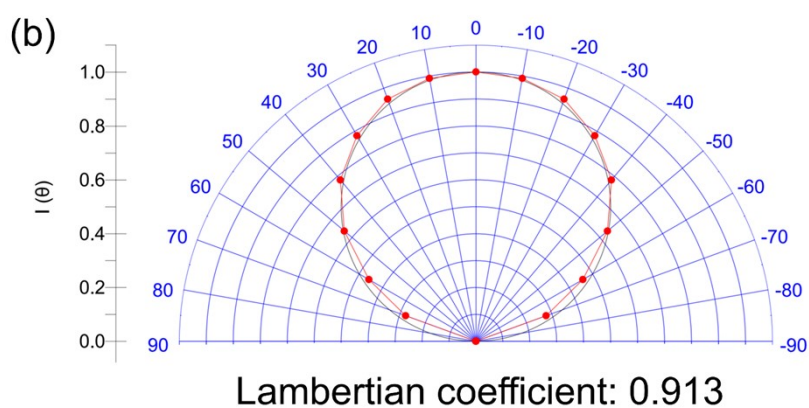

**Fig. S8** Angle-dependent EL intensity profiles of 10 wt.% doped devices based on a) **4CzAQ** and b) **4CzDP**.

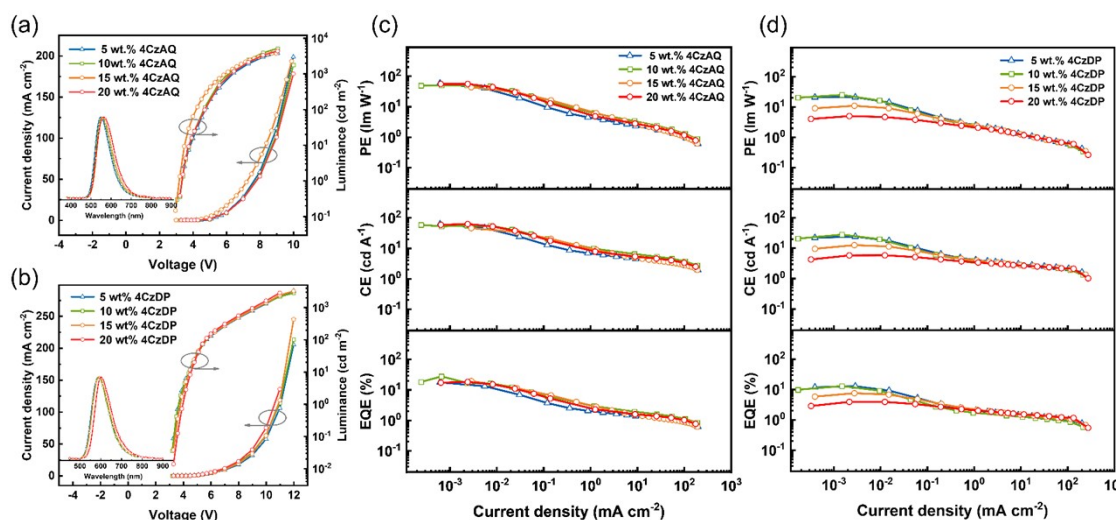

**Fig. S9** (a) Current density and luminance versus driving voltage characteristics (inset: electroluminescent spectra at 100 cd m<sup>-2</sup>) for **4CzAQ**. (b) Current density and luminance versus driving voltage characteristics (inset: electroluminescent spectra at 100 cd m<sup>-2</sup>) for **4CzDP**. (c) Power efficiency (upper), current efficiency (middle) and external quantum efficiency (bottom) versus luminance characteristics for **4CzAQ**. (d) Power efficiency (upper), current efficiency (middle) and external quantum efficiency (bottom) versus luminance characteristics for **4CzDP**.

**Table S3** Summary of OLED device performance utilizing **4CzAQ** and **4CzDP**.

| Dopant | $x$<br>(wt.%) | $V_{on}^a$<br>(V) | $\lambda_{EL}^b$<br>(nm) | $CE_{max}^c$<br>(cd A <sup>-1</sup> ) | $PE_{max}^d$<br>(lm W <sup>-1</sup> ) | $EQE_{max}^e$<br>(%) | $CIE^f$<br>(x, y) |
|--------|---------------|-------------------|--------------------------|---------------------------------------|---------------------------------------|----------------------|-------------------|
| 4CzAQ  | 5             | 3.8               | 550                      | 57.6                                  | 49.1                                  | 17.1                 | (0.38, 0.59)      |
|        | 10            | 3.7               | 555                      | 60.5                                  | 57.5                                  | 26.8                 | (0.43, 0.55)      |
|        | 15            | 3.7               | 560                      | 44.4                                  | 45                                    | 18.9                 | (0.44, 0.51)      |
|        | 20            | 3.6               | 564                      | 51.1                                  | 43.4                                  | 17.6                 | (0.41, 0.56)      |
| 4CzDP  | 5             | 3.9               | 594                      | 22                                    | 19.2                                  | 11.4                 | (0.57, 0.42)      |
|        | 10            | 3.8               | 600                      | 25.4                                  | 22.7                                  | 11.7                 | (0.55, 0.44)      |
|        | 15            | 3.7               | 606                      | 11.4                                  | 10                                    | 6.8                  | (0.56, 0.42)      |
|        | 20            | 3.7               | 616                      | 5.3                                   | 4.6                                   | 3.5                  | (0.60, 0.40)      |

<sup>a</sup>Turn-on voltage at 1 cd m<sup>-2</sup>. <sup>b</sup>EL peak wavelength at 100 cd m<sup>-2</sup>. <sup>c</sup>Maximum current efficiency. <sup>d</sup>Maximum power efficiency. <sup>e</sup>External quantum efficiency values at maximum. <sup>f</sup>CIE 1931 coordinates measured at 100 cd m<sup>-2</sup>.

**Table S4** Electroluminescent performance of representative TADF emitters based on multi-carbazole structure.

| Emitters          | $\lambda_{\text{EL}}$ (nm) | $\text{EQE}_{\text{max}}$ (%) | CIE (x, y)   | Reference |
|-------------------|----------------------------|-------------------------------|--------------|-----------|
| <b>4CzAQ</b>      | 555                        | 26.8                          | (0.43, 0.55) | This work |
| <b>4CzDP</b>      | 600                        | 11.7                          | (0.55, 0.44) | This work |
| <b>4CzBN</b>      | 458                        | 10.6                          | (0.17, 0.20) | 3         |
| <b>4TCzBN</b>     | 463                        | 16.2                          | (0.16, 0.22) | 3         |
| <b>5CzBN</b>      | 490                        | 16.7                          | (0.22, 0.40) | 3         |
| <b>5TCzBN</b>     | 490                        | 21.2                          | (0.21, 0.41) | 3         |
| <b>5Cz-TRZ</b>    | 486                        | 29.3                          | -            | 4         |
| <b>TmCz-TRZ</b>   | 496                        | 19.7                          | -            | 4         |
| <b>6TBN</b>       | 496                        | 23.0                          | (0.09, 0.52) | 5         |
| <b>mPyBN</b>      | 496                        | 17.3                          | (0.22, 0.42) | 6         |
| <b>pCF3BN</b>     | 493                        | 15.1                          | (0.19, 0.40) | 6         |
| <b>PyPhBN</b>     | 501                        | 20.6                          | (0.21, 0.46) | 6         |
| <b>PyCF3BN</b>    | 488                        | 19.5                          | (0.18, 0.38) | 6         |
| <b>CbPyCF3BN</b>  | 494                        | 19.6                          | (0.19, 0.41) | 6         |
| <b>2CPTCB</b>     | 468                        | 21.1                          | (0.15, 0.19) | 7         |
| <b>26DCPTCB</b>   | 504                        | 27.6                          | (0.22, 0.49) | 7         |
| <b>5CzBP</b>      | 512                        | 12.5                          | (0.34, 0.58) | 8         |
| <b>3CzDBFTrz</b>  | 498                        | 18.7                          | (0.19, 0.41) | 9         |
| <b>3mCzDBFTrz</b> | 517                        | 15.7                          | (0.31, 0.58) | 9         |
| <b>26tCzPPC</b>   | 497                        | 25.4,                         | (0.20, 0.47) | 10        |
| <b>246tCzPPC</b>  | 491                        | 29.6                          | (0.18, 0.40) | 10        |
| <b>35tCzPPC</b>   | 494                        | 18.2                          | (0.19, 0.42) | 10        |
| <b>4CzBN</b>      | 458                        | 10.91                         | (0.16, 0.20) | 11        |
| <b>4CzBN-BP</b>   | 474                        | 11.80                         | (0.17, 0.31) | 11        |
| <b>4CzBN-ICz</b>  | 470                        | 4.05                          | (0.18, 0.29) | 11        |
| <b>5tCzMeB</b>    | 481                        | 24.6                          | (0.19, 0.32) | 12        |
| <b>5tCzBP</b>     | 497                        | 12.5                          | (0.23, 0.41) | 12        |
| <b>4PhCz2BN</b>   | 470                        | 22.4                          | (0.13, 0.15) | 13        |

|                    |     |      |              |    |
|--------------------|-----|------|--------------|----|
| <b>2Cz2DMAC2BN</b> | 506 | 20.2 | -            | 14 |
| <b>5CzOXD</b>      | 487 | 8.7  | (0.18, 0.34) | 15 |
| <b>5tCzOXD</b>     | 487 | 14.2 | (0.18, 0.37) | 15 |
| <b>mCF35tCzOXD</b> | 494 | 22.1 | (0.19, 0.42) | 15 |
| <b>pCF35tCzOXD</b> | 494 | 20.3 | (0.19, 0.41) | 15 |
| <b>dCF35CzOXD</b>  | 495 | 18.4 | (0.20, 0.43) | 15 |
| <b>dCF35tCzOXD</b> | 496 | 23.3 | (0.20, 0.45) | 15 |
| <b>4CzIPN</b>      | 509 | 19.3 | -            | 16 |
| <b>4CzTPN-Ph</b>   | 578 | 8.0  | -            | 16 |
| <b>2CzPN</b>       | 471 | 11.2 | -            | 16 |
| <b>HATNA-tCz</b>   | 668 | 1.8  | (0.66, 0.34) | 17 |
| <b>HATNA-tPCz</b>  | 692 | 4.8  | (0.66, 0.32) | 17 |

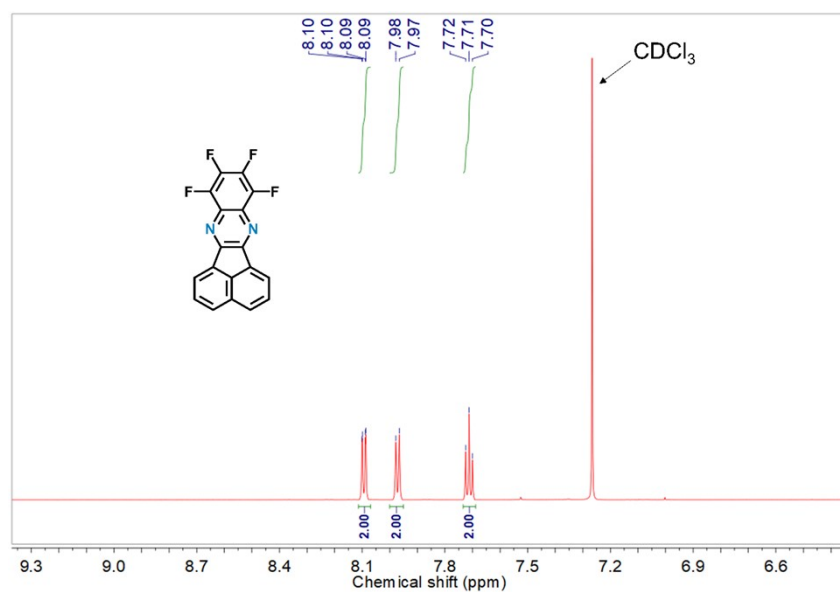

**Fig. S10** <sup>1</sup>H NMR chart of 4FAQ.

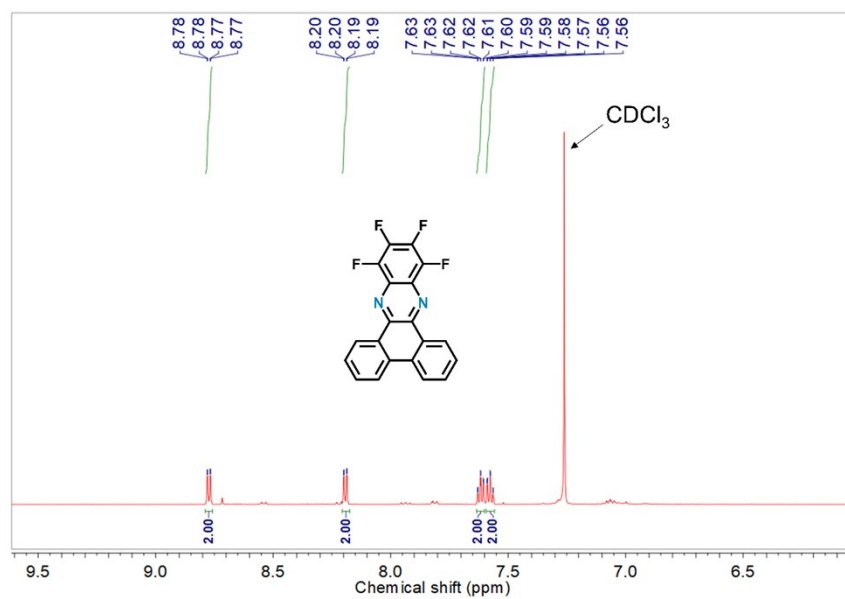

**Fig. S11** <sup>1</sup>H NMR chart of 4FDP.

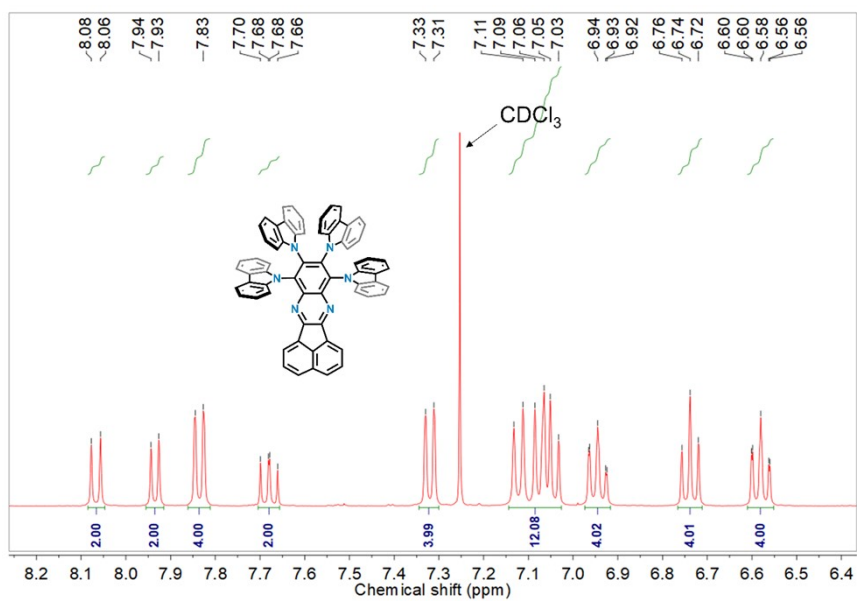

**Fig. S12** <sup>1</sup>H NMR chart of 4CzAQ.

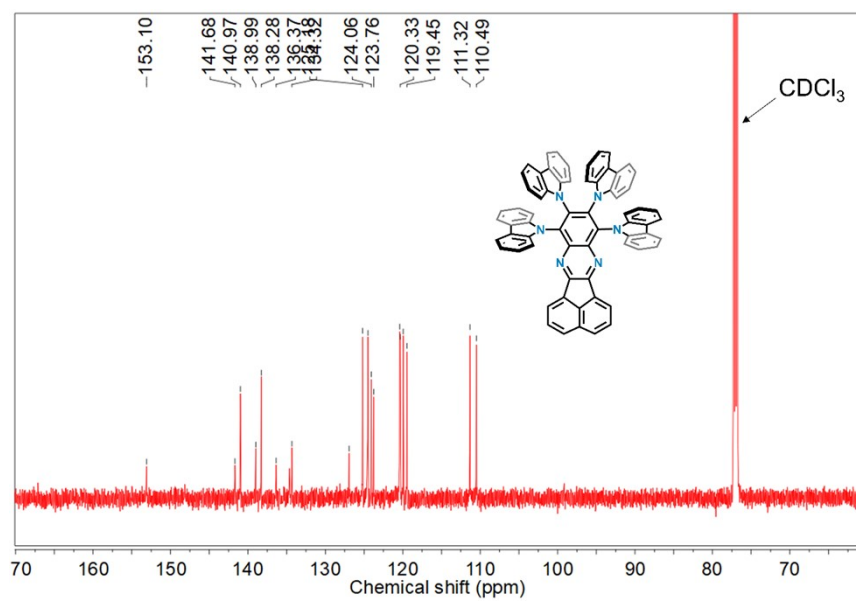

**Fig. S13** <sup>13</sup>C NMR chart of 4CzAQ.

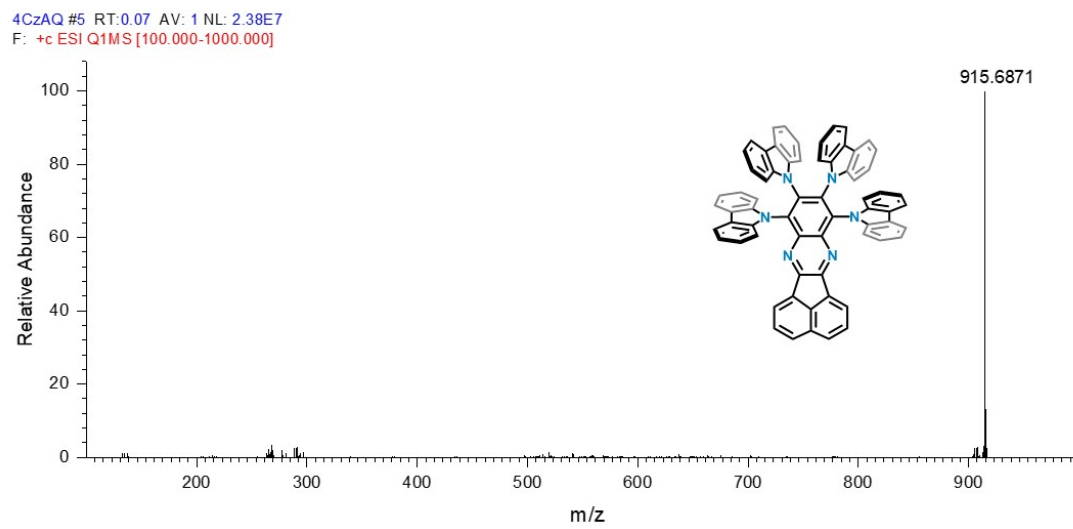

**Fig. S14** MS chart of 4CzAQ.

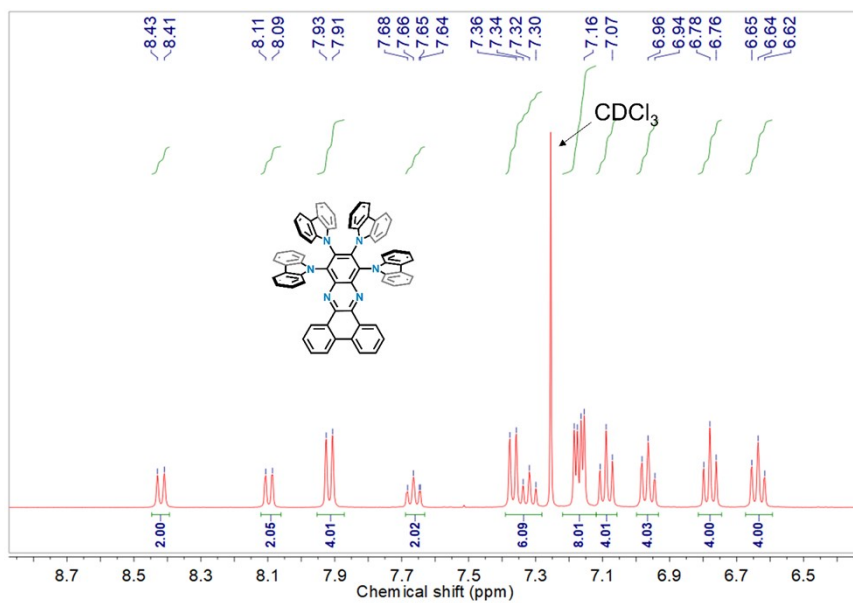

Fig. S15 <sup>1</sup>H NMR chart of 4CzDP.

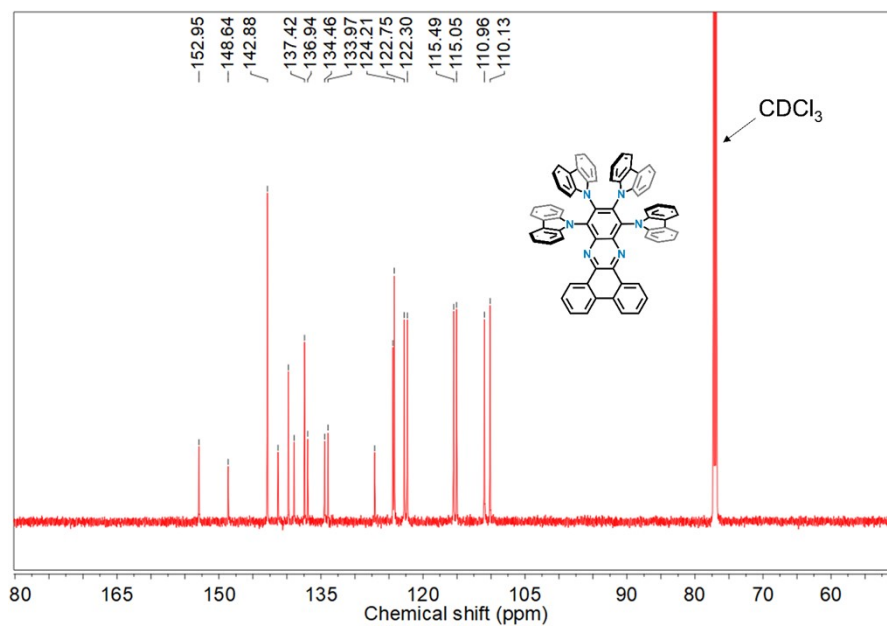

Fig. S16 <sup>13</sup>C NMR chart of 4CzDP.

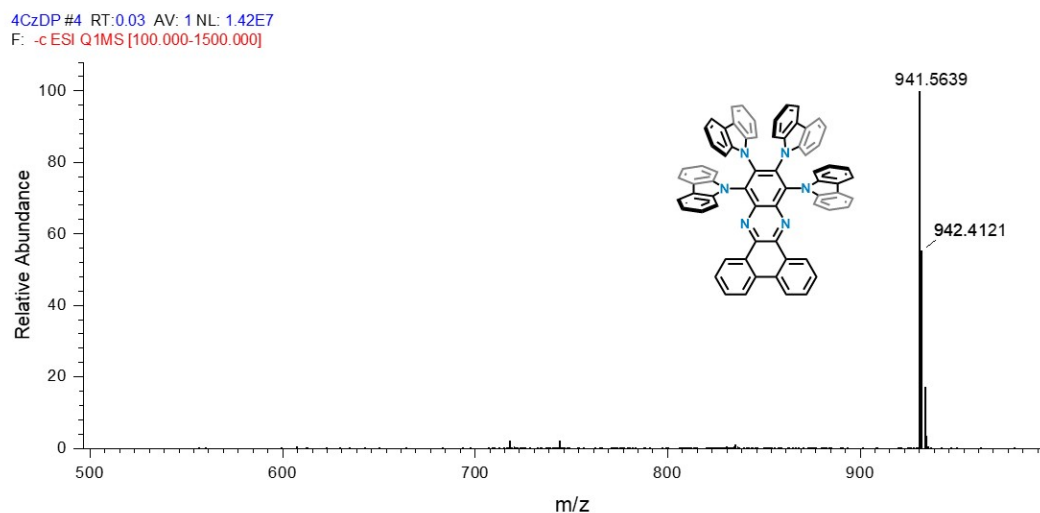

**Fig. S17** MS chart of **4CzDP**.

**Table S5** Crystallographic data and structure refinement for **4CzAQ**.

|                                         |                                                                                                                                                     |
|-----------------------------------------|-----------------------------------------------------------------------------------------------------------------------------------------------------|
| CCDC number                             | 2224330                                                                                                                                             |
| Empirical formula                       | $C_{68}H_{40}Cl_6N_6$                                                                                                                               |
| Formula weight                          | 1153.76                                                                                                                                             |
| Temperature                             | 169.99(10) K                                                                                                                                        |
| Crystal system                          | Monoclinic                                                                                                                                          |
| Space group                             | $P2_1/c$                                                                                                                                            |
| Unit cell dimensions                    | $a=14.4428(7) \text{ \AA}$ $\alpha=90^\circ$<br>$b=17.4445(9) \text{ \AA}$ $\beta=98.072(4)^\circ$<br>$c=22.1522(11) \text{ \AA}$ $\gamma=90^\circ$ |
| Volume                                  | $5525.9(5) \text{ \AA}^3$                                                                                                                           |
| Z                                       | 4                                                                                                                                                   |
| $\rho_{\text{calc}}$                    | $1.387 \text{ g/cm}^3$                                                                                                                              |
| F(000)                                  | 2368.0                                                                                                                                              |
| Crystal size                            | $0.15 \times 0.11 \times 0.09 \text{ mm}^3$                                                                                                         |
| Radiation                               | Mo $K\alpha$ ( $\lambda=0.71073$ )                                                                                                                  |
| Index ranges                            | $-17 \leq h \leq 11, -15 \leq k \leq 20, -26 \leq l \leq 26$                                                                                        |
| Reflections collected                   | 24585                                                                                                                                               |
| Independent reflections                 | 9728 [ $R_{\text{int}} = 0.0287, R_{\text{sigma}} = 0.0393$ ]                                                                                       |
| Data/restraints/parameters              | 9728/108/735                                                                                                                                        |
| Goodness-of-fit on $F^2$                | 1.016                                                                                                                                               |
| Final R indexes [ $I \geq 2\sigma(I)$ ] | $R_1 = 0.0739, wR_2 = 0.1890$                                                                                                                       |



|                            |                                  |
|----------------------------|----------------------------------|
| Final R indexes [all data] | $R_1 = 0.0950$ , $wR_2 = 0.2064$ |
| Largest diff. peak/hole    | 0.73/-1.62 e Å <sup>-3</sup>     |

**Table S6** Crystallographic data and structure refinement for **4CzDP**.

|                                         |                                                                                                                       |
|-----------------------------------------|-----------------------------------------------------------------------------------------------------------------------|
| CCDC number                             | 2224332                                                                                                               |
| Empirical formula                       | C <sub>70</sub> H <sub>44</sub> Cl <sub>4</sub> N <sub>6</sub>                                                        |
| Formula weight                          | 1110.91                                                                                                               |
| Temperature                             | 149.99(10) K                                                                                                          |
| Crystal system                          | Monoclinic                                                                                                            |
| Space group                             | $P2_1/c$                                                                                                              |
| Unit cell dimensions                    | $a=15.1734(4)$ Å $\alpha=90^\circ$<br>$b=17.1579(4)$ Å $\beta=100.849(3)^\circ$<br>$c=21.4227(6)$ Å $\gamma=90^\circ$ |
| Volume                                  | 5477.6(3) Å <sup>3</sup>                                                                                              |
| Z                                       | 4                                                                                                                     |
| $\rho_{\text{calc}}$                    | 1.347 g/cm <sup>3</sup>                                                                                               |
| F(000)                                  | 2296.0                                                                                                                |
| Crystal size                            | 0.14 × 0.12 × 0.1 mm <sup>3</sup>                                                                                     |
| Radiation                               | Cu K $\alpha$ ( $\lambda = 1.54184$ )                                                                                 |
| Index ranges                            | $-18 \leq h \leq 18$ , $-21 \leq k \leq 20$ , $-25 \leq l \leq 26$                                                    |
| Reflections collected                   | 22116                                                                                                                 |
| Independent reflections                 | 10796 [ $R_{\text{int}} = 0.0399$ , $R_{\text{sigma}} = 0.0486$ ]                                                     |
| Data/restraints/parameters              | 10796/0/721                                                                                                           |
| Goodness-of-fit on F <sup>2</sup>       | 1.016                                                                                                                 |
| Final R indexes [ $I \geq 2\sigma(I)$ ] | $R_1 = 0.0648$ , $wR_2 = 0.1603$                                                                                      |
| Final R indexes [all data]              | $R_1 = 0.0807$ , $wR_2 = 0.1761$                                                                                      |
| Largest diff. peak/hole                 | 0.68/-0.97 e Å <sup>-3</sup>                                                                                          |

## References

- 1 T. Lu and F. Chen, *J. Comput. Chem.*, 2012, **33**, 580–592.
- 2 W. Humphrey, A. Dalke and K. Schulten, *J. Mol. Graph.*, 1996, **14**, 33–38.
- 3 D. Zhang, M. Cai, Y. Zhang, D. Zhang and L. Duan, *Mater. Horiz.*, 2016, **3**, 145–151.
- 4 L.-S. Cui, A. J. Gillett, S.-F. Zhang, H. Ye, Y. Liu, X.-K. Chen, Z.-S. Lin, E. W. Evans, W. K. Myers, T. K. Ronson, H. Nakanotani, S. Reineke, J.-L. Bredas, C. Adachi and R. H. Friend, *Nat. Photonics*, 2020, **14**, 636–642.
- 5 F.-M. Xie, H.-Z. Li, K. Zhang, H.-Y. Wang, Y.-Q. Li and J.-X. Tang, *ACS Appl. Mater. Interfaces*, 2023, **15**, 39669–39676.

- 6 U. Balijapalli, M. Tanaka, M. Auffray, C.-Y. Chan, Y.-T. Lee, Y. Tsuchiya, H. Nakanotani and C. Adachi, *ACS Appl. Mater. Interfaces*, 2020, **12**, 9498–9506.
- 7 M. Xu, M. Liu, M. Shi, M. U. Ali, S. Jiao, W. Cao, Y.-C. Wu and H. Meng, *J. Mater. Chem. C*, 2019, **7**, 13754–13758.
- 8 F. Wang, X. Cao, L. Mei, X. Zhang, J. Hu and Y. Tao, *Chin. J. Chem.*, 2018, **36**, 241–246.
- 9 J. H. Yun, K. H. Lee, H. Jeong and J. Y. Lee, *J. Mater. Chem. C*, 2022, **10**, 10950–10956.
- 10 J. Jayakumar, T.-L. Wu, M.-J. Huang, P.-Y. Huang, T.-Y. Chou, H.-W. Lin and C.-H. Cheng, *ACS Appl. Mater. Interfaces*, 2019, **11**, 21042–21048.
- 11 J. Kim, C. W. Joo, S.-J. Woo, J. Park, J. Lee and Y.-H. Kim, *J. Mater. Chem. C*, 2022, **10**, 7304–7310.
- 12 G. Kreiza, D. Banevičius, J. Jovaišaitė, K. Maleckaitė, D. Gudeika, D. Volyniuk, J. V. Gražulevičius, S. Juršėnas and K. Kazlauskas, *J. Mater. Chem. C*, 2019, **7**, 11522–11531.
- 13 M. Mamada, H. Katagiri, C. Chan, Y. Lee, K. Goushi, H. Nakanotani, T. Hatakeyama and C. Adachi, *Adv. Funct. Mater.*, 2022, **32**, 2204352.
- 14 B. Madushani, M. Mamada, K. Goushi, T. B. Nguyen, H. Nakanotani, H. Kaji and C. Adachi, *Sci. Rep.*, 2023, **13**, 7644.
- 15 D. Hu, M. Zhu, C. Shi, W. Yuan, N. Sun, B. Huang and Y. Tao, *J. Mater. Chem. C*, 2021, **9**, 13384–13391.
- 16 H. Uoyama, K. Goushi, K. Shizu, H. Nomura and C. Adachi, *Nature*, 2012, **492**, 234–238.
- 17 X. Zhou, Y. Xiang, S. Gong, Z. Chen, F. Ni, G. Xie and C. Yang, *Chem. Commun.*, 2019, **55**, 14190–14193.
